# Supplementary material for: Reaction-based fluorescent silk probes with high sensitivity and selectivity to Hg2+and Ag+ions
Source: Royal Society of Chemistry journal article supplement (doi:10.1039/d0tc05429a), 2021-01-01
Supplement: d0tc05429a1.pdf [file d0tc05429a1.pdf]

## **Supplementary Material**

### **Reaction-based fluorescent silk probes with high sensitivity and selectivity to Hg<sup>2+</sup> and Ag<sup>+</sup> ions**

Li Xiao<sup>a</sup>, Kaiqi Liu<sup>a</sup>, Lian Duan<sup>b\*</sup>, Xinjian Cheng<sup>a\*</sup>

<sup>a</sup>School of Chemistry and Environmental Engineering, Wuhan Institute of Technology, Wuhan, China, 430073

<sup>b</sup>School of Textiles and Garments, Southwest University, Chongqing, 400715, PR China

---

\*Corresponding author: Dr. Duan, [duan19850420@163.com](mailto:duan19850420@163.com); Dr. Cheng, [chxj606@163.com](mailto:chxj606@163.com).

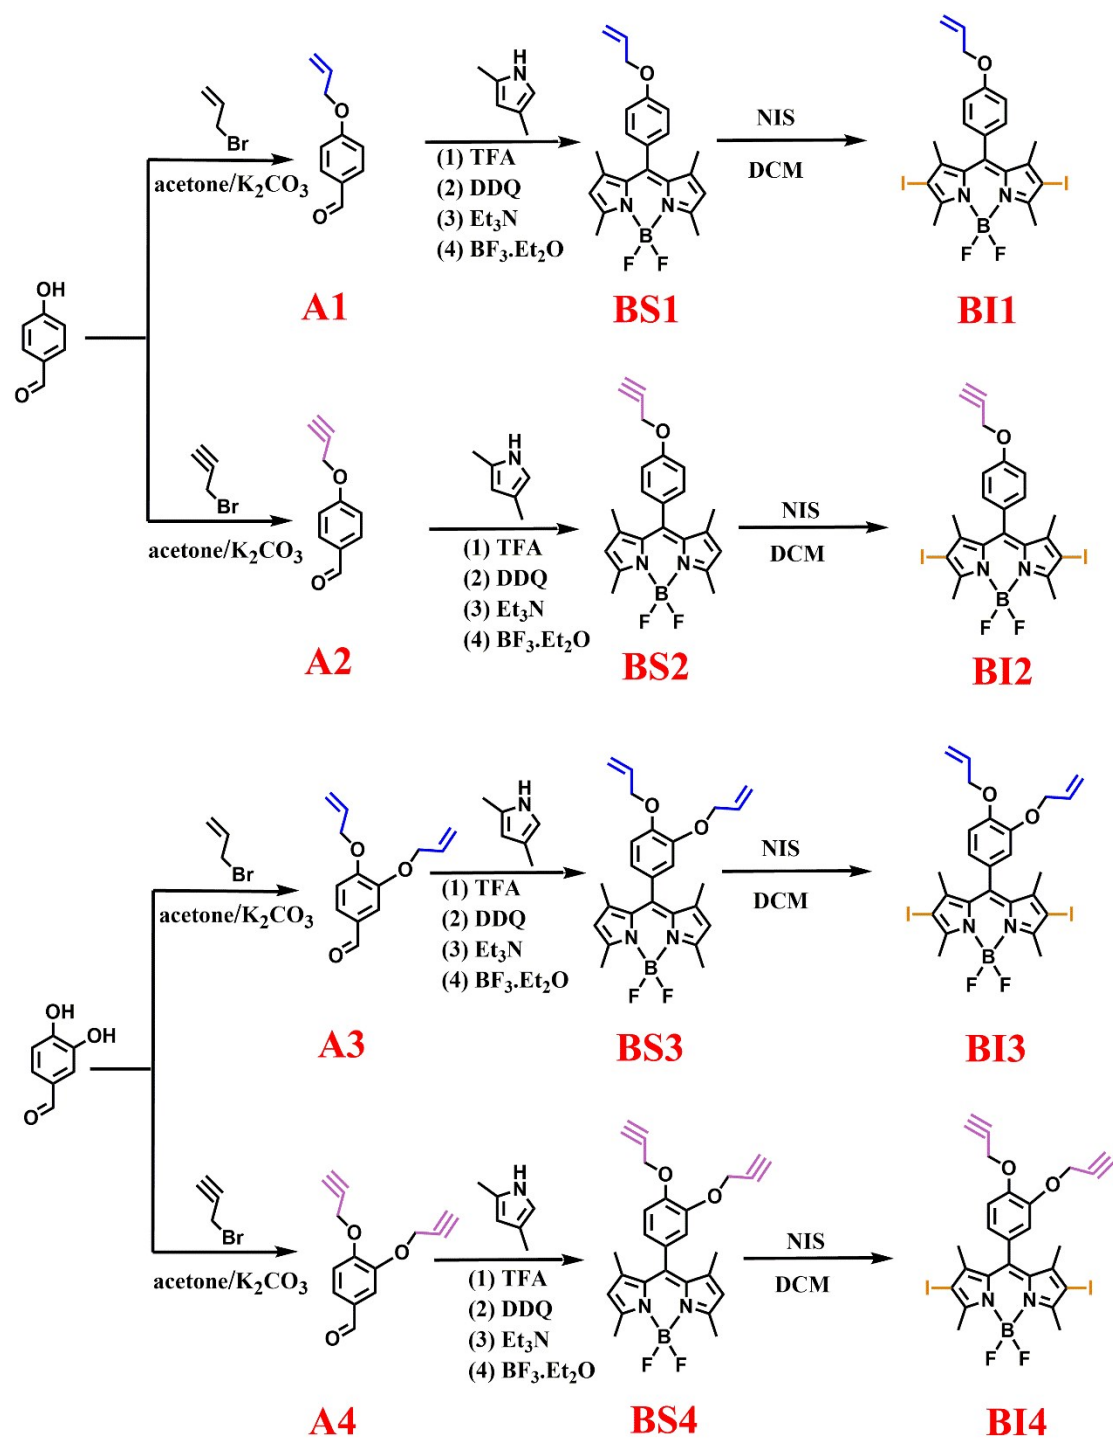

**Scheme S1.** Synthetic route of small molecule compounds

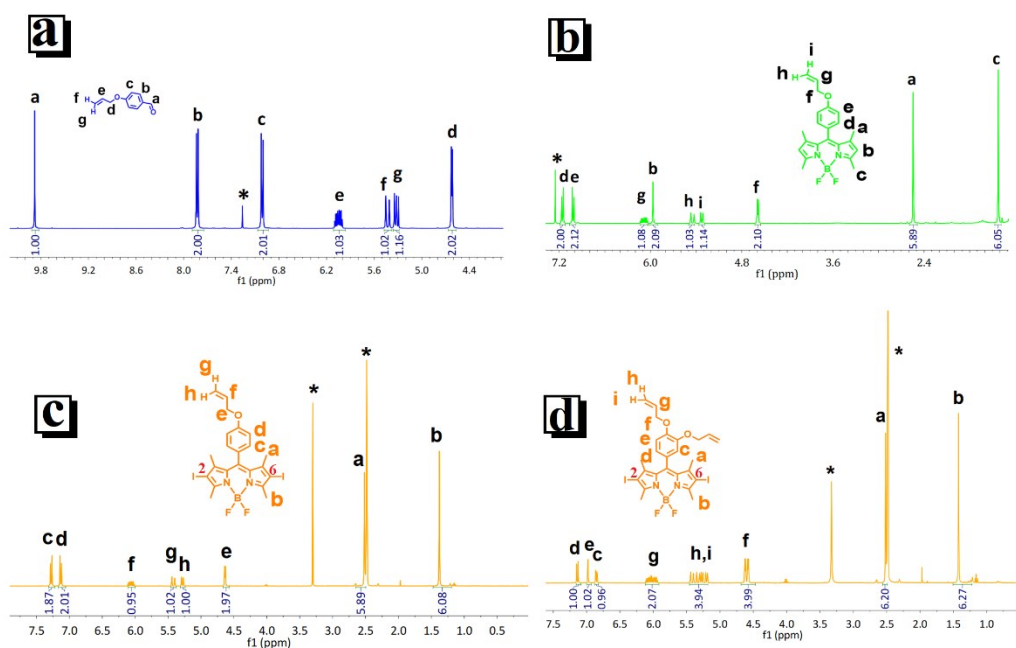

**Figure S1.**  $^1\text{H}$  NMR spectra of small molecule compounds (a) A1, (b) BS1, (c) BI1, and (d) BI3

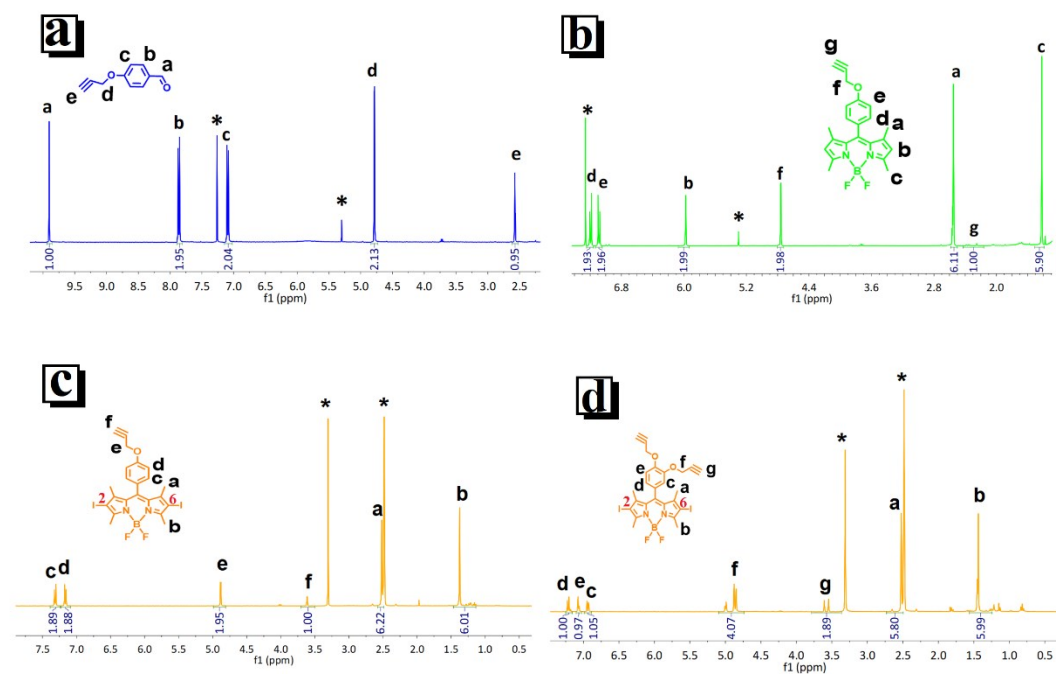

**Figure S2.**  $^1\text{H}$  NMR spectra of small molecule compounds (a) A2, (b) BS2, (c) BI2, and (d) BI4

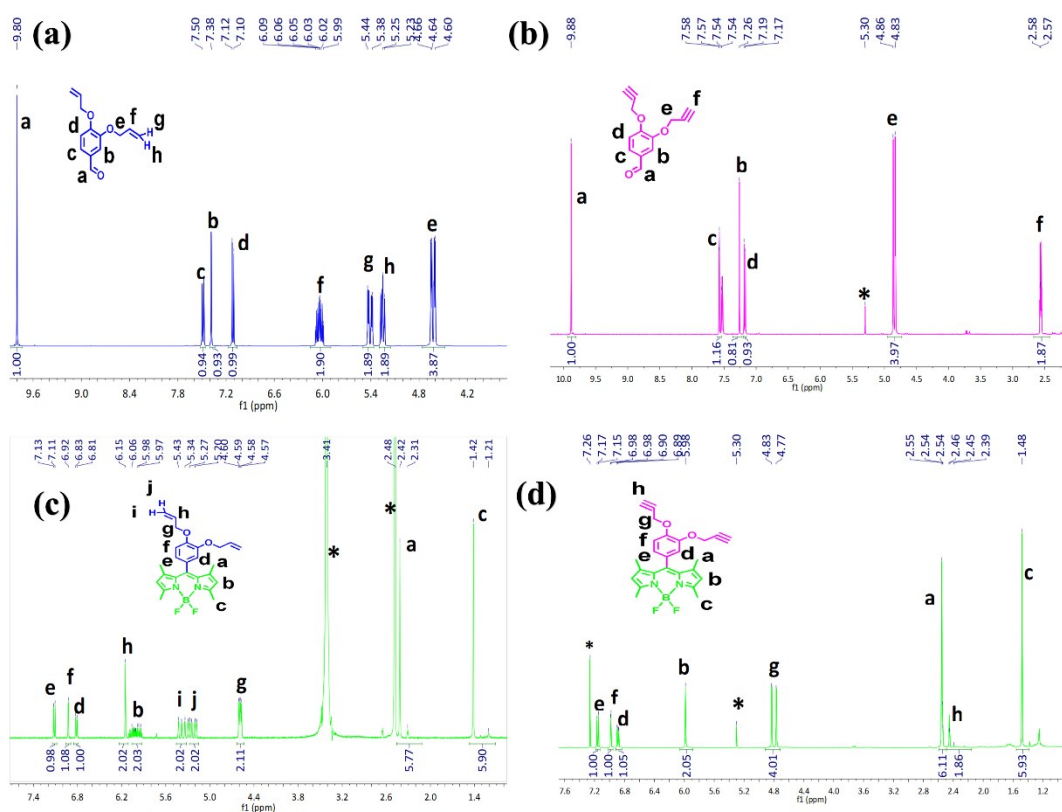

**Figure S3.**  $^1\text{H}$  NMR spectra of small molecule compounds (a) A3, (b) A4, (c) BS3, and (d) BS4

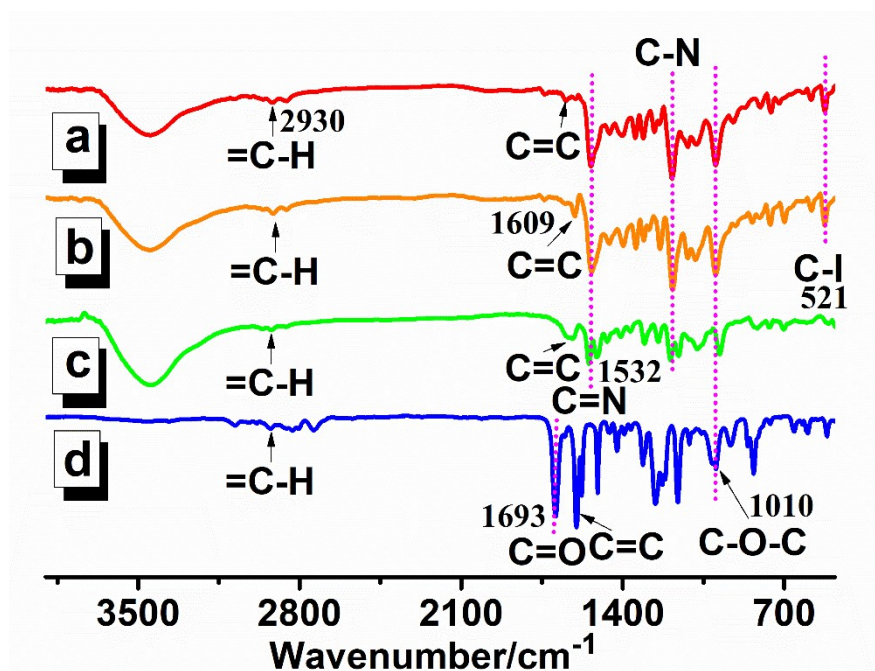

**Figure S4.** FTIR spectrum of (a) BI3, (b) BI1, (c) BS1, and (d) A1

|               |         |             |                |                 |              |                        |                        |
|---------------|---------|-------------|----------------|-----------------|--------------|------------------------|------------------------|
| Sample Name   | Sample8 | Position    | P1-A8          | Instrument Name | Instrument 1 | User Name              |                        |
| Inj Vol       | -1      | InjPosition |                | SampleType      | Sample       | IRM Calibration Status | Some Ions Missed       |
| Data Filename | WYZ-1.d | ACQ Method  | Default-TEST.m | Comment         |              | Acquired Time          | 11/26/2019 10:26:34 AM |

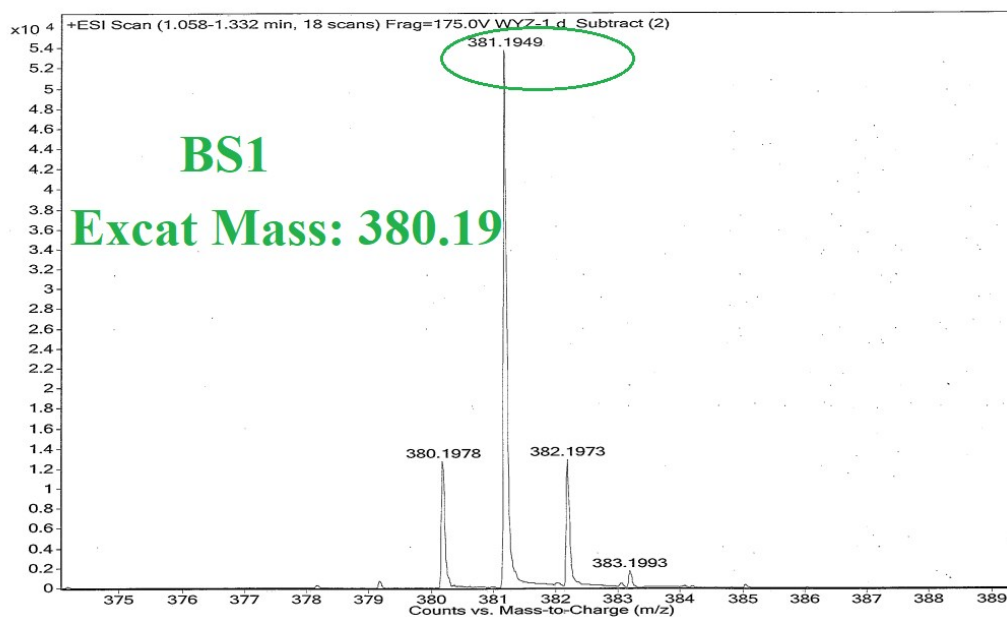

**Figure S5. ESI-HRMS spectrum of BS1**

|               |         |             |                |                 |              |                        |                      |
|---------------|---------|-------------|----------------|-----------------|--------------|------------------------|----------------------|
| Sample Name   | Sample4 | Position    | P1-A4          | Instrument Name | Instrument 1 | User Name              |                      |
| Inj Vol       | -1      | InjPosition |                | SampleType      | Sample       | IRM Calibration Status | Some Ions Missed     |
| Data Filename | XL-4.d  | ACQ Method  | Default-TEST.m | Comment         |              | Acquired Time          | 9/17/2020 3:50:13 PM |

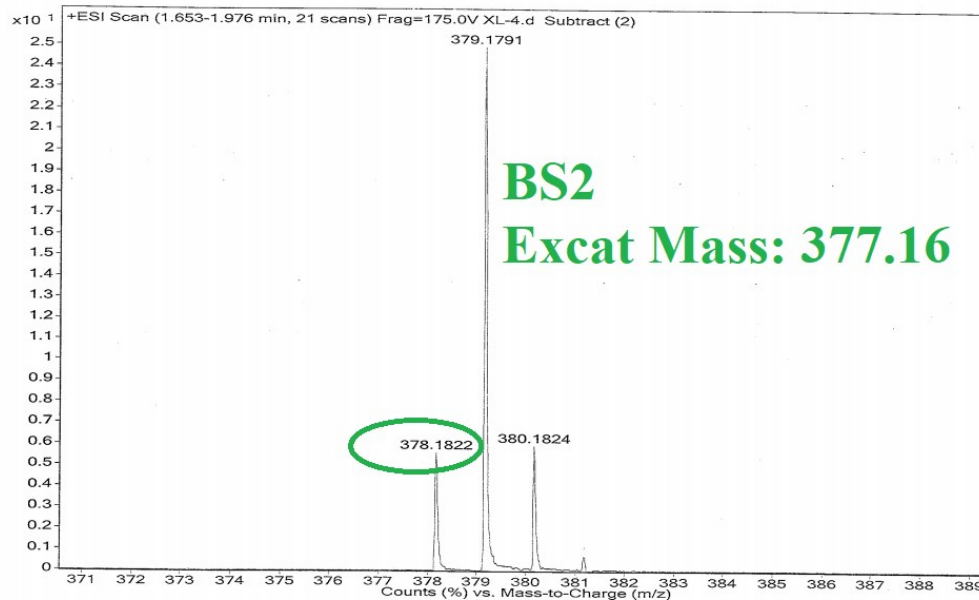

**Figure S6. ESI-HRMS spectrum of BS2**

|               |         |             |                |                 |              |                        |                        |
|---------------|---------|-------------|----------------|-----------------|--------------|------------------------|------------------------|
| Sample Name   | Sample9 | Position    | P1-A9          | Instrument Name | Instrument 1 | User Name              |                        |
| Inj Vol       | -1      | InjPosition |                | SampleType      | Sample       | IRM Calibration Status | Some Ions Missed       |
| Data Filename | WYZ-2.d | ACQ Method  | Default-TEST.m | Comment         |              | Acquired Time          | 11/26/2019 10:33:28 AM |

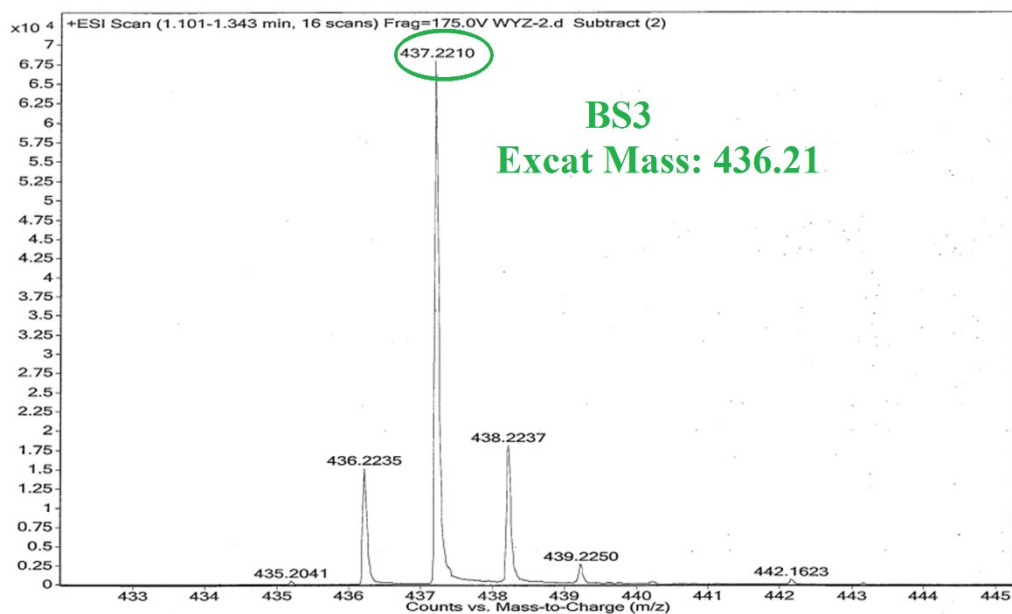

**Figure S7. ESI-HRMS spectrum of BS3**

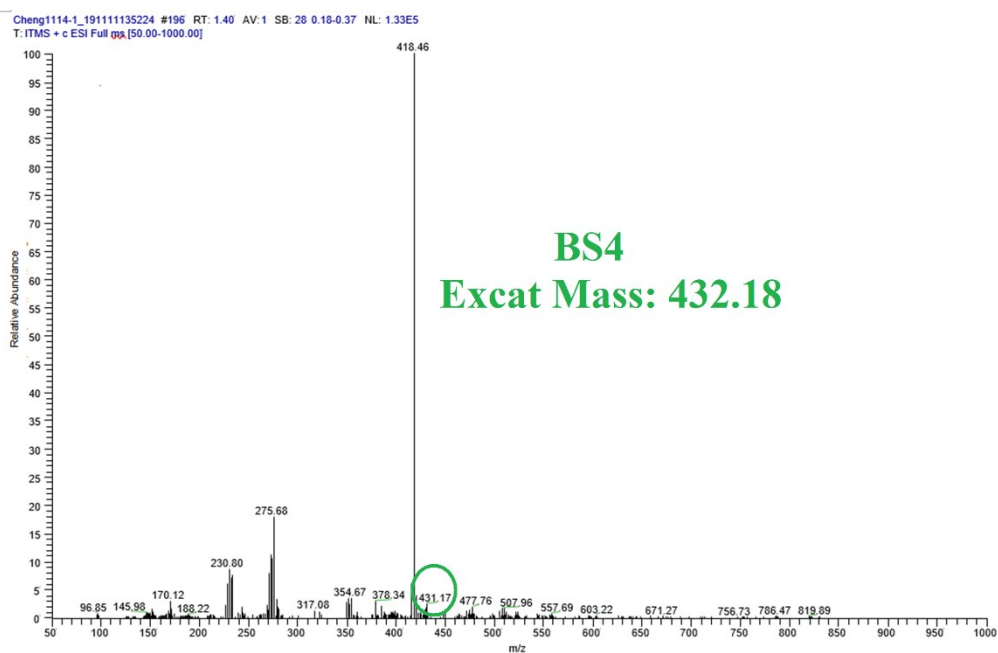

**Figure S8. ESI-HRMS spectrum of BS4**

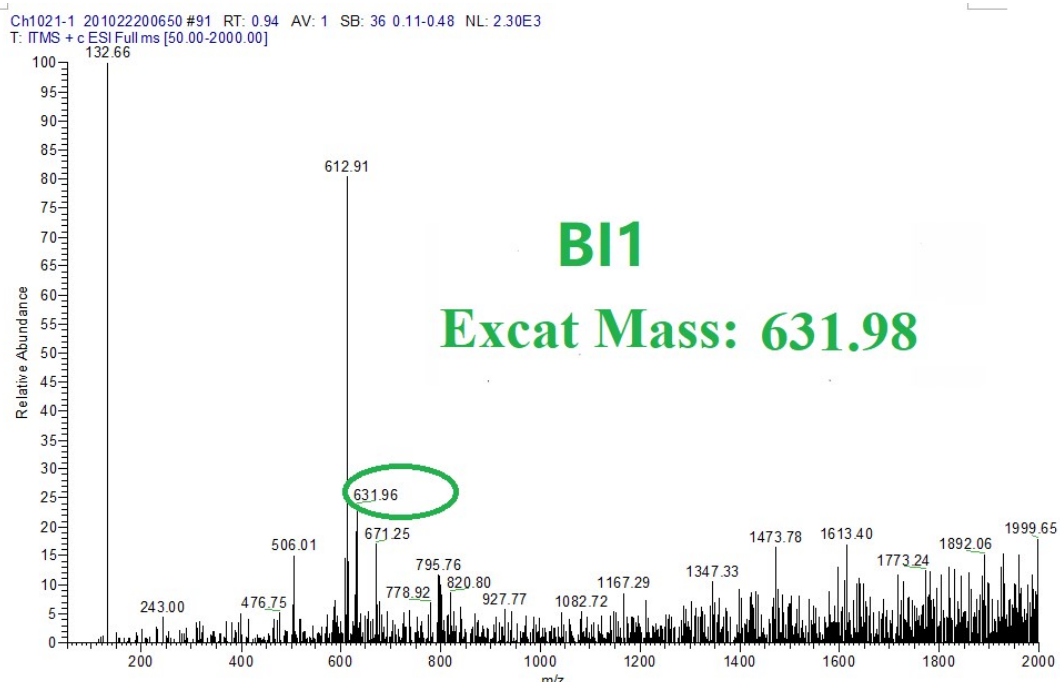

Figure S9. ESI-HRMS spectrum of BI1

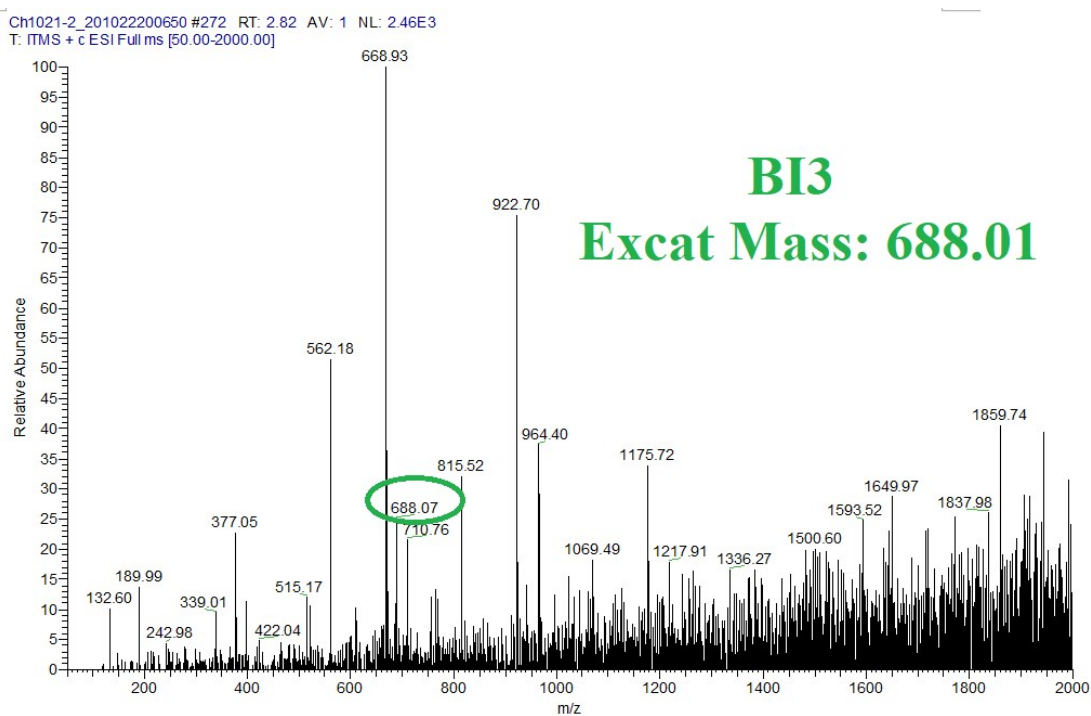

Figure S10. ESI-HRMS spectrum of BI3

**Table S1.** Distribution of XPS spectra for untreated silk (S0, P0) and fluorescent silk (OSP, ASP)

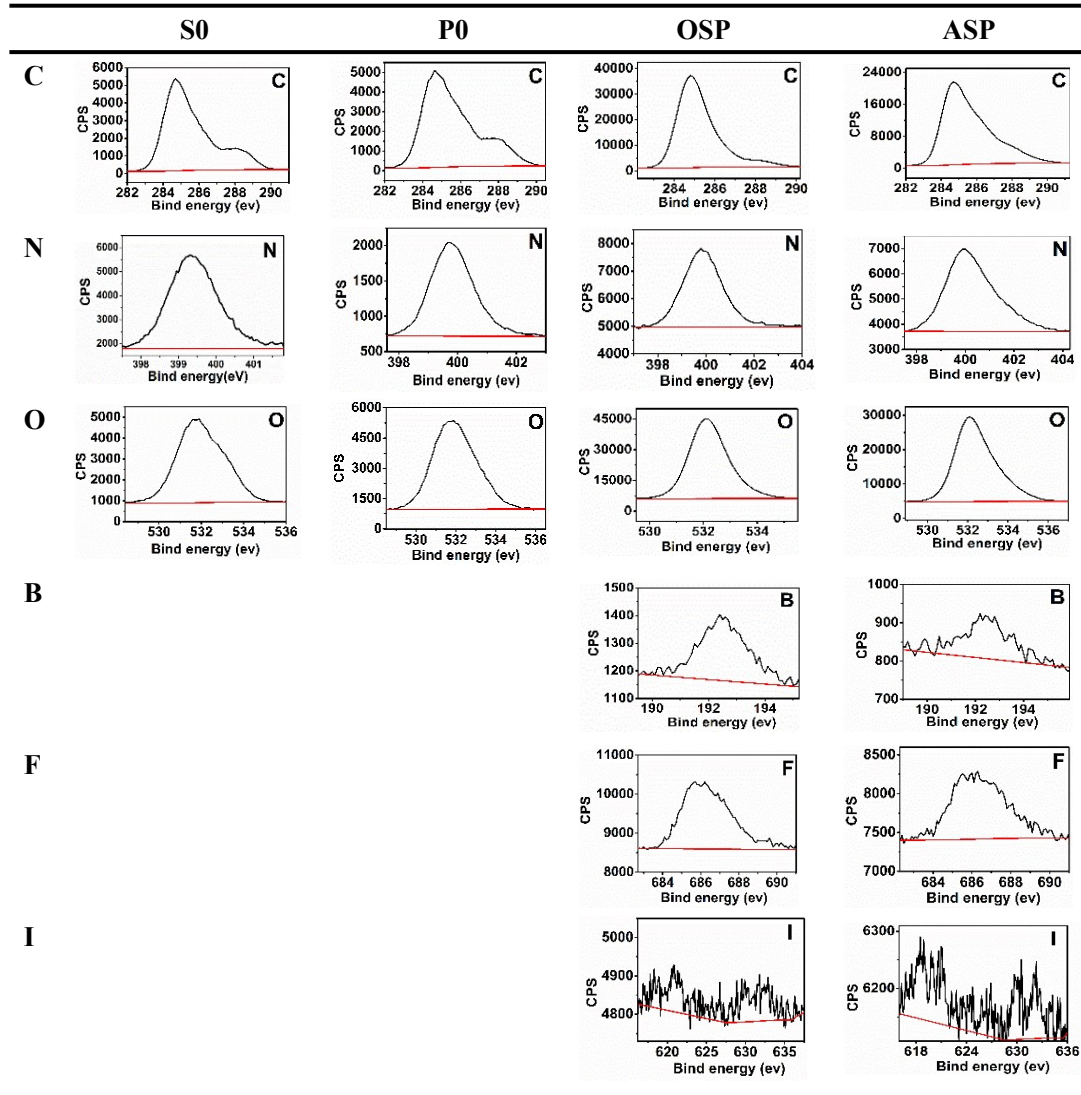

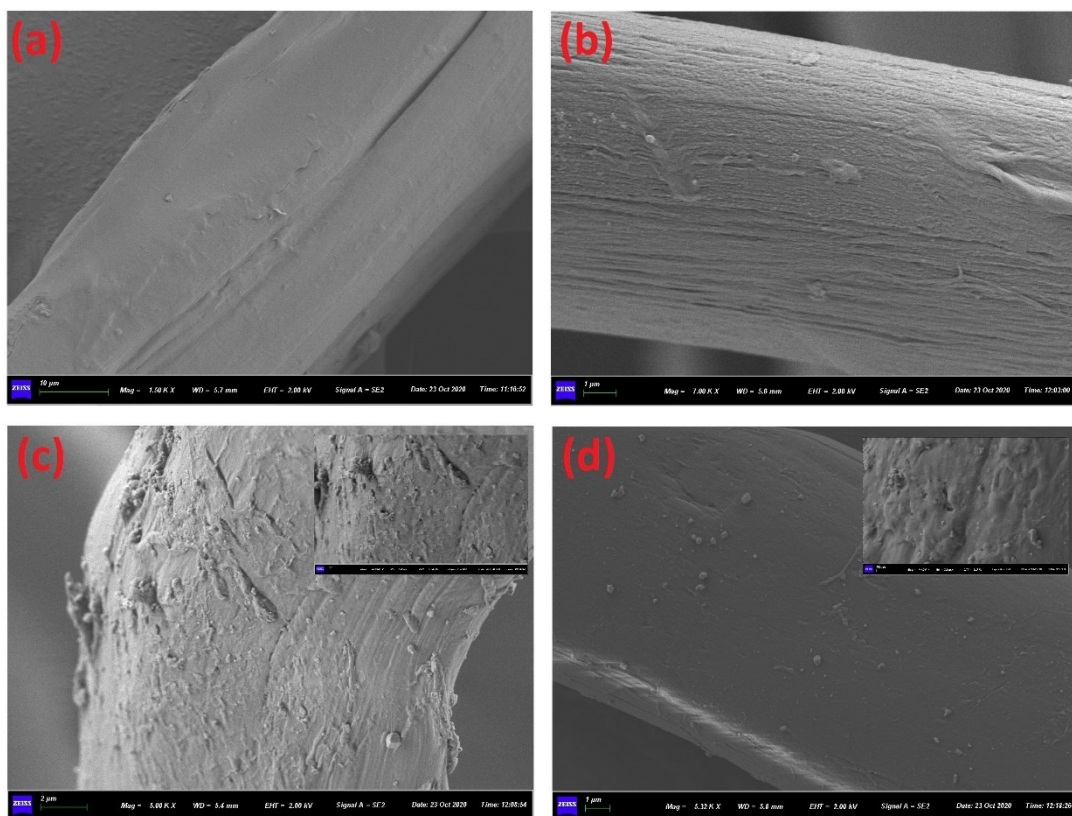

**Figure S11.** SEM micrographs and partial enlarged photos of silk (a) un-degummed silk **S0**, (b) degummed silk **P0**, (c) fluorescent silk **OSP**, and (d) fluorescent silk **ASP**

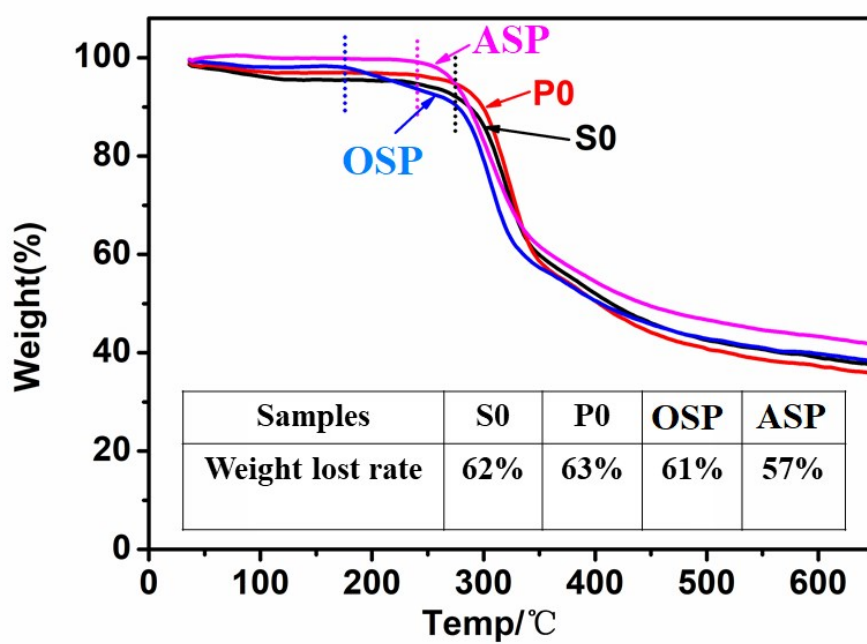

**Figure S12.** TGA curves of un-degummed silk (**S0**), degummed silk (**P0**), fluorescent silk (**OSP** and **ASP**)

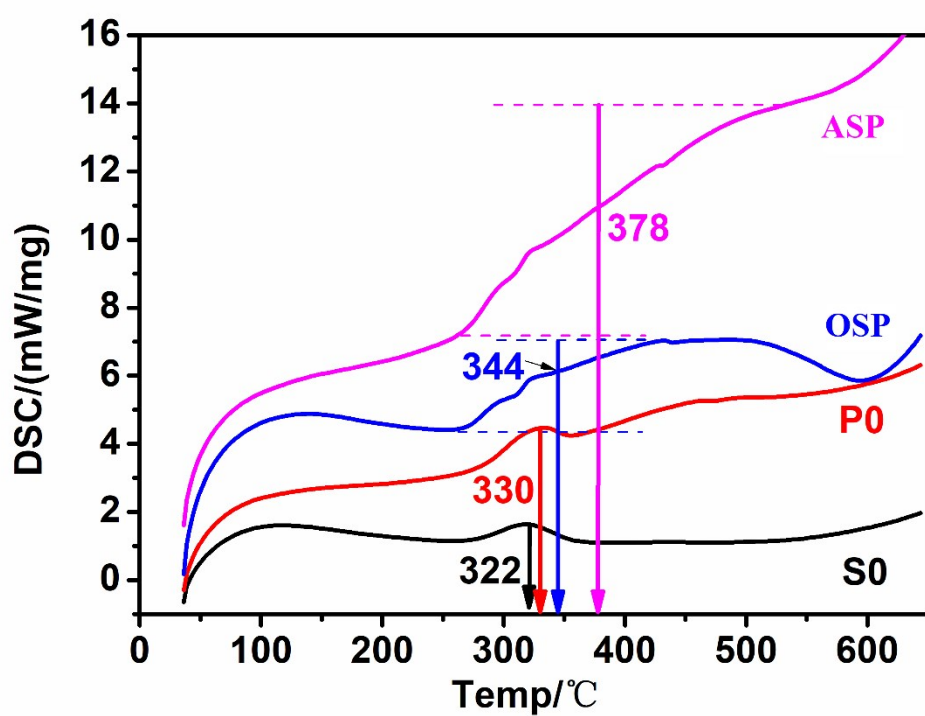

Figure S13. DSC curves of un-degummed silk (S0), degummed silk (P0), fluorescent silk (OSP and ASP)

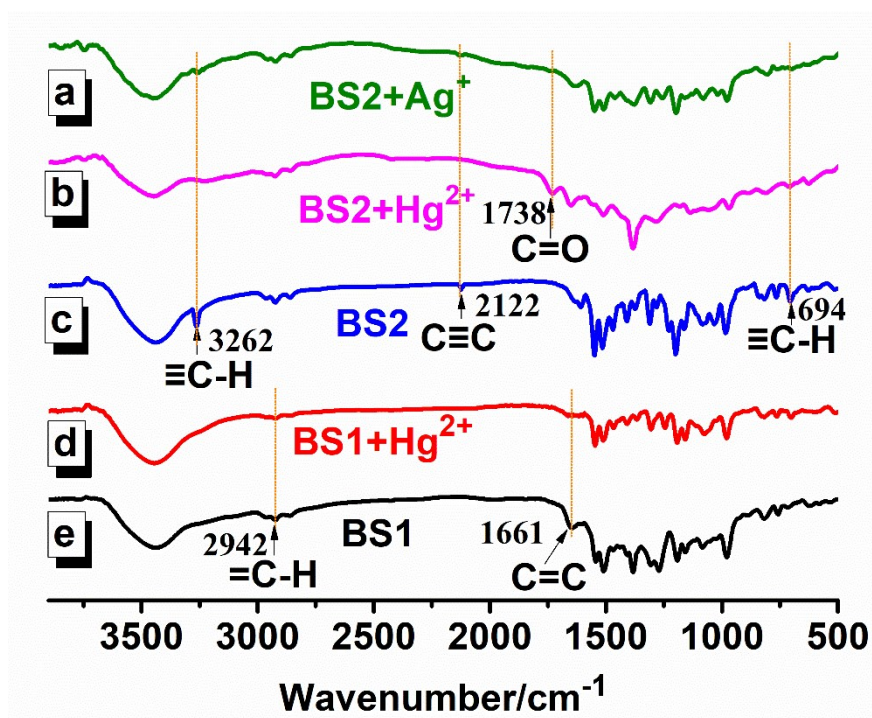

Figure S14. FTIR spectra of (a) BS2+Ag<sup>+</sup>, (b) BS2+Hg<sup>2+</sup>, (c) BS2, (d) BS1+Hg<sup>2+</sup>, and (e) BS1

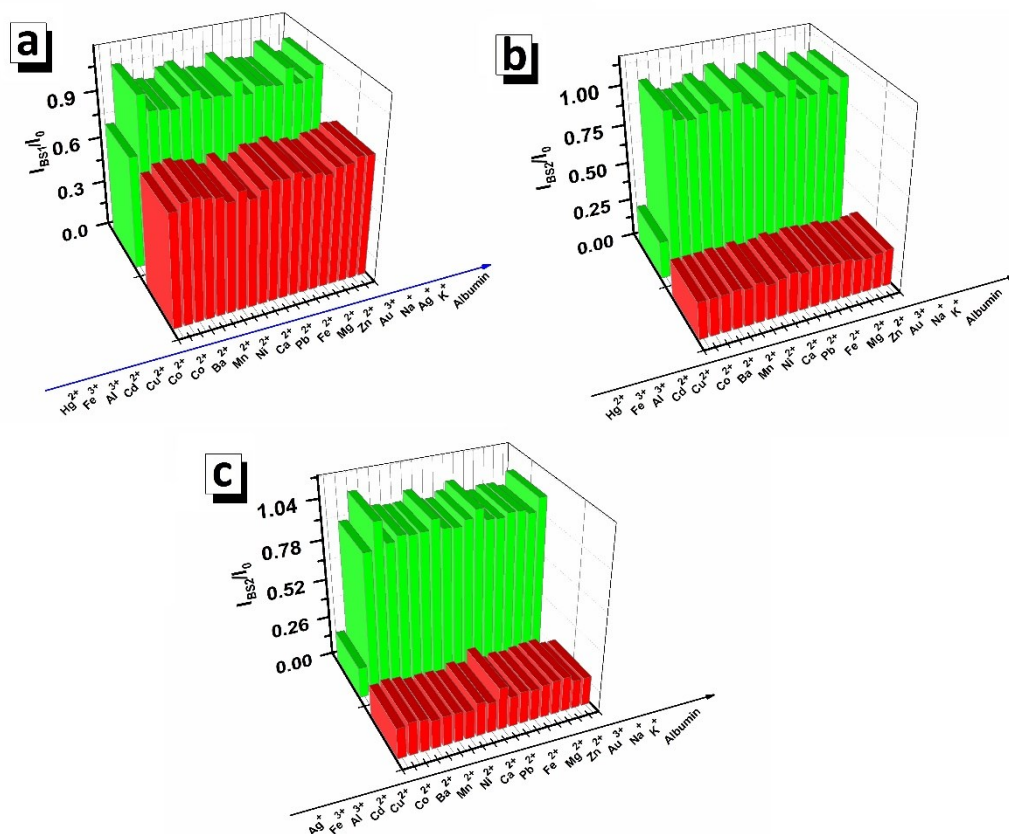

**Figure. S15** (a) Fluorescence response of **BS1** to other metal ions and bovine serum albumin in the presence of  $\text{Hg}^{2+}$  (b) Fluorescence response of **BS2** to other metal ions and bovine serum albumin in the presence of  $\text{Hg}^{2+}$  (c) Fluorescence response of **BS2** to other metal ions and bovine serum albumin in the presence of  $\text{Ag}^+$

**Table S2.** Comparison of  $\text{Hg}^{2+}$  adsorption by untreated silk (**P0**) and fluorescent silk (**OSP/ASP**)

|                                                      | <b>P0</b> | <b>OSP</b> | <b>ASP</b> |
|------------------------------------------------------|-----------|------------|------------|
| Initial $\text{Hg}^{2+}$ mg/L (C0)                   | 351       | 351        | 351        |
| Remain $\text{Hg}^{2+}$ mg/L (C)                     | 123       | 28.5       | 96.9       |
| Average quality of samples mg (m)                    | 43.45     | 51.5       | 35.4       |
| Adsorption efficiency $\%.\text{mg}^{-1}$ ( $\eta$ ) | 1.49      | 1.78       | 2.05       |
| $\text{Hg}^{2+}$ content tested by XPS (%)           | -         | 0.89       | 1.13       |

$$\eta = \frac{C0 - C}{C0 * m}$$

**Table S3.** Comparison and evaluation of the basic properties of the reported sensors and sensors synthesized in this work

| Sensor  | LOD                     | Selectivity                                | Kinetics       | Applications                      | Reference |
|---------|-------------------------|--------------------------------------------|----------------|-----------------------------------|-----------|
| Cy-PT   | 0.18 $\mu\text{M}$      | Excellent ( $\text{Hg}^{2+}$ )             | Rapid response | Living cells and zebrafish        | 46        |
| OTA-DCM | 0.14 $\mu\text{M}$      | High ( $\text{Hg}^{2+}$ )                  | Rapid response | Living cells and zebrafish larvae | 47        |
| TBBA    | 13.10 nM                | Sensitive ( $\text{Hg}^{2+}$ )             | -              | Living cells and zebrafish        | 48        |
| NPPI    | 3.86 $\mu\text{M}$      | High ( $\text{Ag}^+$ )                     | Rapid response | Living cells and zebrafish larvae | 49        |
| BS4     | 0.25/0.83 $\mu\text{M}$ | Sensitive ( $\text{Ag}^+/\text{Hg}^{2+}$ ) | -              | Aqueous adsorbent                 | this work |

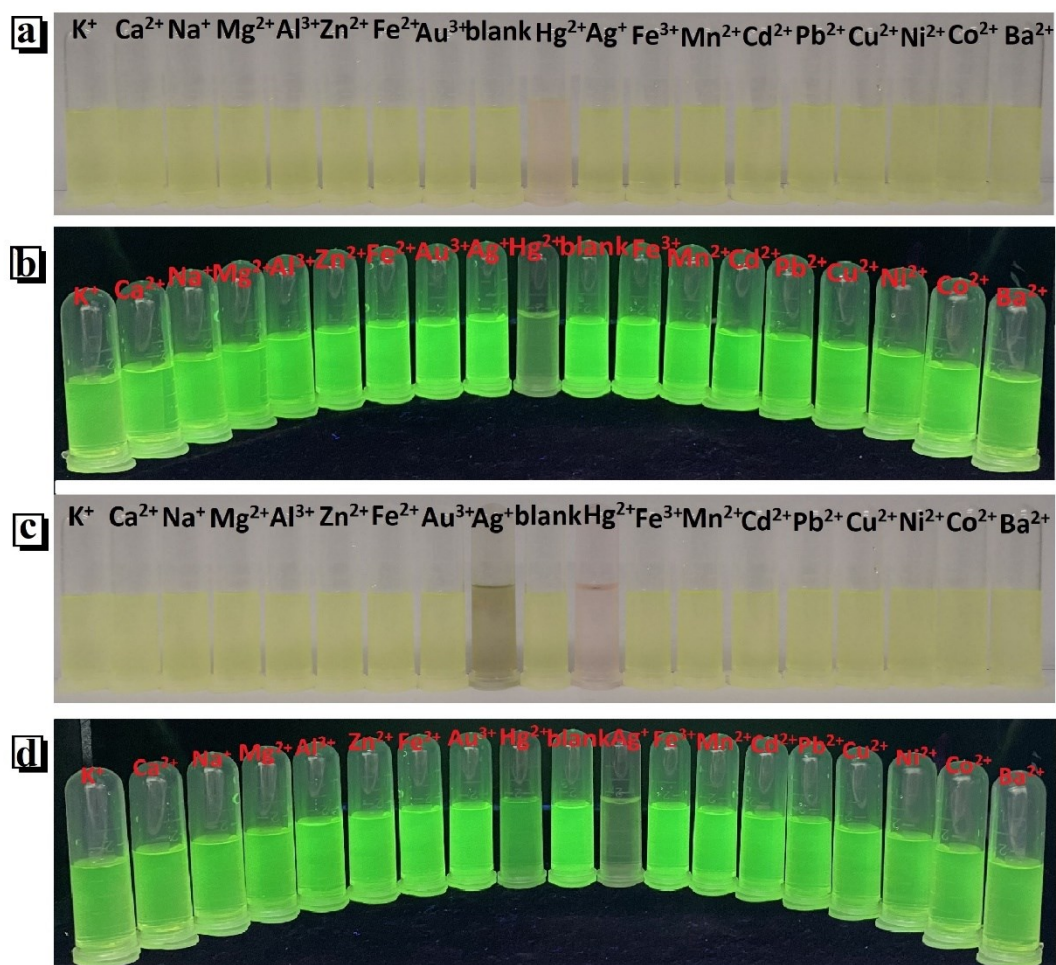

**Figure. S16** (a) Photographs of **BS1** (10  $\mu\text{M}$ ) with heavy metal ion in DMF under natural light and (b) UV light. (c) Photographs of **BS2** (10  $\mu\text{M}$ ) in DMF under natural light and (d) UV light

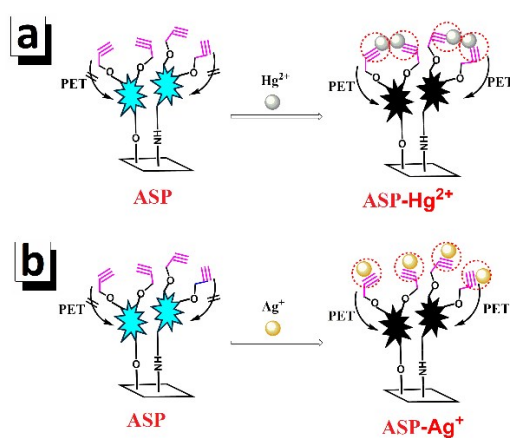

**Scheme S2.** Structural representation of the binding sites of (a) **ASP-Hg<sup>2+</sup>**, (b) **ASP-Ag<sup>+</sup>**
